# Supplementary material for: Pepino (<em>Solanum muricatum</em>) Metabolic Profiles and Soil Nutrient Association Analysis in Three Growing Sites on the Loess Plateau of Northwestern China
Source: Preprints.org preprint supplement (doi:10.20944/preprints202208.0537.v1), 2022-08-31
Supplement: Supplementary file 3 [file supplementary]

## Sheet: S1
Metabolite name	HaiDong_1	HaiDong_2	HaiDong_3	HaiDong_4	HaiDong_5	HaiDong_6	WuWei_1	WuWei_2	WuWei_3	WuWei_4	WuWei_5	WuWei_6	JiuQuan_1	JiuQuan_2	JiuQuan_3	JiuQuan_4	JiuQuan_5	JiuQuan_6
vanillic acid	5704862	3123833	5863301	8047362	4142377	6546951	5337164	8311580	3407824	3476440	5658412	7661530	4897478	39602024	6533375	4101118	5456854	10780704
Uridine-5-monophosphate	1087446912	1064216384	1062062336	1159655552	1220165888	937707840	1197042432	1065352064	1038182848	995520576	1149092608	1036106112	819356544	821129920	822611776	938797952	846199168	754306048
Uridine 5'-monophosphate	305649376	313125984	285232000	287187424	336144576	265506928	297651456	270352960	266803456	244500704	292130944	270869888	219304832	206851664	204133824	236489120	227120928	207111200
Uridine 5'-diphospho-D-glucose	91904848	90396136	119928664	105693264	103895840	89397472	227009616	157806160	233040480	232058080	241426864	238654048	177873024	201111376	190226256	159874896	167433920	145038480
Uridine	667565824	751336768	657989696	659765440	645580800	666972864	579012352	674363008	590130560	633532032	604760576	606756416	959565696	948373632	953542976	959051328	943609600	931834432
Uric acid	3985504	2949362	4401566	4979626	3236953	9421935	8017119	6597327	4128729	6557504	6389451	5629746	32887546	34467548	32199804	33343148	35027728	33059376
Undecanedioic acid	29915454	43429592	39053436	47452548	38528016	97118552	25159440	27002912	34433612	27781368	35454632	33387678	28154712	36025536	27312608	31550472	33607676	35403032
UDP-xylose	78584608	97173008	92996472	106390536	96699784	89699160	170006304	171197696	166960256	176219664	160434800	183549488	84860728	94636040	93269144	80064504	77757912	69603344
Tridecanedioic acid	24493702	28533402	22925428	29411596	21672338	63015928	23455532	24286668	23647178	23448154	26479130	21109224	22583378	26582422	21609396	22667402	25915018	24062260
trans-4-Hydroxy-3-methoxycinnamate	26473670	30583452	28283826	28142840	29768058	26413364	16707290	18969128	16378609	17457972	17773840	19258912	18649302	20861656	21163662	18199376	18195714	18140552
Threonic acid	2059315328	2083010432	2119067776	1882414848	2010994944	1983908096	2473835008	4398257152	3459804160	4892221440	2580923904	3099290624	1496876288	1491710976	1458476160	1552894592	1390474240	1481111680
Tetradecylsulfate	4234990592	2304171776	822833472	797714368	764788160	503932928	3273475584	2997133568	1900995072	2270084352	401069024	1600047232	1575719040	420430016	1082300160	900093440	815263616	3191576832
Sucrose	39273123840	38896005120	39527526400	36300939264	38589665280	37349269504	31636623360	31635034112	31252527104	29402337280	31127597056	29653594112	42057940992	37803503616	38085713920	39733948416	38277455872	39388418048
Succinic acid	1333000704	1460239232	1372982656	1465580544	1257530368	1284235136	1243913088	1378134272	1470933632	1398087424	1191155840	1379875968	965566848	932623040	895218816	894975104	941047488	940676544
Suberic acid	52788168	59927736	59795476	79572360	42892332	71220720	57327484	59329448	40597772	62738108	59720084	49729644	47326224	75302344	59874244	66890240	76943048	73347728
Sinapic acid	10810198	10735069	11945429	11567749	10930167	11444170	7861617	9118338	8984059	8714182	9413206	8553230	7906320	7793168	8228724	7641104	7676672	7418430
Shikimic acid	121563232	133898456	149792752	108845632	122130240	125805768	62916048	73556616	84460728	106321432	89182416	93845648	81068792	93951680	91466552	75887208	80250880	67009248
Serine	110903600	110363632	80356184	113209328	129198672	116056312	270787264	354456928	302242112	361473376	310633216	276944512	310370336	264682496	326170880	297443456	302460320	295163648
Sebacic acid	26506608	38262564	30939746	38331560	26562796	48696036	29121986	19832804	20366584	22956492	33769188	27540210	22687330	27784876	24552162	22316198	27449812	30607910
Ribose	1459796736	1532649344	1574072576	1519490688	1463039104	1478043008	1678029056	1605829504	1651171072	1663128320	1665919744	1715070464	1007954816	1080098944	1081354240	1021070912	1010049408	976716416
Quinic acid	290308704	343291904	351348544	312611104	284445888	311234432	133106784	140834352	183255744	189208544	170610512	190353808	216415872	221084176	231730000	200601520	197319888	180953376
Pyroglutamic acid	694512832	731309312	1183939584	1152436992	976155200	742682176	578559424	541250688	522409312	533039872	535158496	581533120	2551702528	2852656128	2668867072	2699008000	2702879488	2592725248
Pimelic acid	38978424	45174812	42267908	37230288	33801636	43403268	35472632	30575532	30976964	28728746	28999660	31775472	63943348	58434500	60617736	62321720	57381544	58176716
PI 34:2	72116040	2203681	76790232	69464552	72807608	131989656	144457680	79088792	96243592	74636456	88923160	54700528	75461944	113631800	98017928	80953112	107390392	65450416
Phosphoric acid	2177583872	1230171264	1251931136	2007371904	2589603584	2033707648	1825282176	2298818304	2425325824	1962758016	1722894592	2148358656	1507255424	1686541824	2284397312	1668660864	1982822528	1782868608
Phenylpyruvic acid	72029552	74326184	75652368	73267784	71794744	74824384	96903296	87512256	92604552	106134584	102214888	94520920	48099000	49751440	42354024	43852488	44902784	42863316
Phenyl-butyryl-glutamine	541959	738013	392861	280476	420867	482615	313574	389578	127055	382815	480093	445149	16645067	25381374	21869298	18095496	17074960	15253878
Phenylbenzimidazolesulfonic acid	95857328	109646392	102675784	93860744	85658544	105657344	8248300	5754390	8808259	15661224	6370745	4987511	2650786	4023542	1895373	6654569	3478948	5288491
Phenylalanine	18761774	22180796	19141280	23703906	18261314	20858418	22030748	22487884	19878604	28050286	26408970	20400460	44163380	48477392	46470640	48242300	46596300	41685948
Phenylacetic acid	932600576	1074832768	1024872448	950946368	924033856	923075264	583470080	589767936	687819328	673269248	659798208	679558400	1149543168	1314416512	1277619968	1137420800	1083931776	1050034752
Phenol sulfate	0	0	10570356	39406960	11882931	0	0	0	0	0	0	0	0	5988790	0	0	9133947	0
Pentose-Hexose + C10H17	3727334	4418014	4086498	4092028	3620468	3979583	3816379	3887619	5257992	4896052	4775161	4952458	10711255	12695072	12355182	11284208	11258152	10902250
P-Coumaric acid	2805294336	3017188864	3006911744	2951827712	2811701760	2911457536	1892007936	2113760384	2354412288	2129139712	2189202688	2196185344	2113565952	2256620032	2138846592	2101454336	2075300480	2157587712
NCGC00385695-01_C21H28O13_alpha-D-Glucopyranoside, beta-L-fructofuranosyl 6-O-[(2E)-3-(4-hydroxyphenyl)-1-oxo-2-propen-1-yl]-	345506528	340364416	371574816	307153792	304576128	296544672	269399520	237436208	255149216	259546080	263341872	239782928	362654784	339465312	301321728	336665536	352681440	320930624
NCGC00380867-01_C27H46O9_9,12,15-Octadecatrienoic acid, 3-(hexopyranosyloxy)-2-hydroxypropyl ester, (9Z,12Z,15Z)-	11950901	38191944	10231922	11162586	10467121	29415974	12501732	8492090	8018715	11947286	120322576	24327382	11908112	11188897	9905559	10157808	9753405	10450120
NCGC00180738-02!(E)-3-[2-[(2S,3R,4S,5S,6R)-3,4,5-trihydroxy-6-(hydroxymethyl)oxan-2-yl]oxyphenyl]prop-2-enoic acid	1648888320	1823616384	1851986944	1697899136	1584965376	1698706560	1087427328	1232347264	1380230912	1186607104	1281451264	1306536832	1345690240	1397687808	1349788288	1209458688	1201860224	1291029376
N-Acetyl-tyrosine; LC-tDDA; CE10	467392	834366	627731	786724	439013	812522	2148904	1789818	1462771	1996011	2073626	2180004	35456484	36877096	38922708	34356332	36197296	38083016
N-Acetyl-tryptophan; LC-tDDA; CE10	9701176	13022097	13358940	10597194	9473468	10407752	44546836	19270580	20184484	25135522	24995268	26018544	29017058	28712328	24106874	30789400	29813178	26874958
Mucic acid	2057978752	2280569856	2204029952	2110123904	2022311168	1778356352	2661952512	2480866048	3072960000	2889733888	2371305728	2942620672	1410852864	1437461376	1490922880	1347119744	1297048576	1126959232
Monoethyl phthalate	28721436	29880396	29849040	27003008	27676730	29360598	16285488	17927676	22292996	19404722	20305612	20639324	13721280	16203174	15914349	13140007	12797902	13539548
Methylmalonic acid; LC-tDDA; CE10	136257040	150934528	119799032	121682048	165085872	143654256	191754832	160738480	130681984	208930288	207181888	169828480	108886704	107773344	97434160	120460216	107729472	98757928
Malonic acid; LC-tDDA; CE10	134375456	130419080	138566512	116650600	150701856	125876672	111073456	166610592	227586720	280647008	246439984	215037792	78908760	97173360	376435232	98461480	79967520	335360480
Maleic acid	1373202176	1345686144	1454392320	1295328640	1350224384	1298606592	1259261824	1169410816	1167601664	1243719552	1236812544	1217632896	1695953664	1670460160	1622356352	1650969600	1609893376	1636871040
Luteolin	595159	630312	596528	424589	71650	7273540	6363490	30559250	945741	1109499	5653563	1324976	616255	19641598	678039	490204	1232771	10444787
L-Tyrosine	43654764	41190240	42124428	53290284	46464312	44656068	39441548	50967956	50748136	54745044	48266124	43422088	75148272	71021088	71643888	78667432	77258040	74588192
L-Tryptophane	8190326	10727860	9740232	9033538	8658619	9257831	19517628	20618220	21038486	22744842	18655608	21048362	45441388	51244256	47377008	44939484	40302708	41570264
L-SORBOSE	2357865728	2599326208	3076939776	2625057280	2653644288	3026012672	2240997888	2226434048	2071733632	2238131200	2436200960	2897828352	1939764480	2665603328	2143197824	2495938560	2367115008	2417878272
LPE 18:2	43459100	58889912	38986108	71288624	68071320	56512032	31786524	62128556	62653912	58787920	41009776	55520424	29279262	56846416	36628604	52747420	38897028	50176784
LPE 16:0	49534276	57169508	47244884	84825856	78573872	59574268	49133680	75178208	68955192	72034192	56860196	71615280	29543918	46865140	35065640	45742200	36580072	41743848
LPC 18:3	9926118	17931346	12354963	14712122	13516617	13626994	8696916	8678228	13727290	13610353	10799921	11957351	7706998	15135082	9969485	11678912	9567313	10961174
LPC 18:2	63626444	79106760	63004432	91792312	80223096	76340040	43218472	63781336	77513808	66312656	53231388	61277308	49063756	83406592	63105904	71703184	56853648	59849172
Linoleic acid	23452290	26180056	18149074	22450152	22296150	19001120	17798390	32789708	18027246	25938220	9267183	11402949	28278640	25100114	22419156	30794856	26182752	20178196
Lactic acid	2599641344	1533285760	1156777472	1262307328	2753852672	2781659904	2654137344	2627789056	2802048000	2746998528	2774452736	2797441280	3178131200	3056282624	2907105024	1571202688	3045590528	2827133184
L(+)-Arginine	200919104	223386768	265134928	220310528	220623376	215937472	310895904	225106416	225011312	317573312	269148448	277582400	1316434432	1314088832	1248246784	1330693120	1266075008	1258306688
Jasmonic acid	46781364	58405324	51609204	71803384	63151196	61369388	70602216	58274620	77288008	63226136	96065752	128469472	193761072	124074456	112656232	153285248	158160928	151856336
Isorhamnetin	0	0	0	0	0	16105878	211629	0	0	0	9564949	0	0	0	0	0	0	0
Isethionic acid	16258952	12044681	21264416	16630095	16460078	16701778	64635648	35102796	32766728	32068374	19206508	23741018	24989648	38360732	40972532	26794924	34861616	19386764
Inosine	13599583	16171206	15213795	13247317	13302377	21326518	8862577	9221510	8118012	9711891	11572323	9909333	11695643	11272678	10965721	11748121	10950994	11232678
Indole-3-Carboxaldehyde	22488580	22313014	19189852	19438328	14499599	14021753	18825904	18133606	15525739	13675326	17478518	15171231	16239330	26874226	30081892	21931312	16326660	17986496
Histidine	265667584	278750496	279107936	288159200	274662400	281302528	272193632	245243296	232760208	252981808	236815968	241768064	645563840	652270400	637833792	663712896	634264512	620891776
Guanosine 5'-monophosphate	53613172	50789632	55214808	46931812	52831472	47291800	53270012	38354392	48898944	48280296	50255312	49967120	42204640	46461408	44421464	53275832	42717384	37346472
Guanosine	365388800	400640224	376881088	372227840	347415584	367359744	357758272	392756352	374579872	407091680	374004768	405863136	534850048	542578880	518827072	529431168	519725216	519007904
Guanine	23504266	25283536	24619312	24991688	23224120	24631054	24275180	25721168	25030730	26214880	25177156	26594392	33609748	34612720	33066180	33585176	33206072	33152834
Gly-Leu	23780692	28284686	24346538	23197412	22820328	25787748	22504964	24958252	19249482	23097132	19435056	18837382	21709058	21489998	19534796	22109626	21489780	20189458
Glycolic acid	817617280	788057344	796413760	775265344	774842688	810603456	1018875968	946774720	1096856960	1066048704	1193050112	1150167424	801494848	876758400	849869248	782556352	825011776	791124608
Glycerol 3-phosphate; LC-tDDA; CE10	993697536	953213184	990676800	913540544	914329920	965830592	1454287744	1343666816	1250568960	1117213312	1202138496	1220129408	761731840	729662656	680802240	763401024	698310208	694272128
Glyceric acid	560177280	565403008	568313664	595062016	649489664	555424448	1696606848	985546304	1444793728	1171057152	1410171904	1507242368	888117632	894864384	889157056	910453376	877125120	995678848
Glutathione (oxidized)	88250032	80747472	113221304	74814392	85858104	85576776	80104232	88296344	80045408	99684384	95667544	105150096	126719072	122812360	119048136	132362872	119511728	110060752
Glutathione (oxidized form)	74669824	65869000	99036848	72235424	84387624	72521120	67120944	84546216	81496160	89717952	97653496	94603912	126644360	112731568	122755552	121139016	126735392	96865536
Glutamine	291883392	283778720	270530944	300292864	295544256	300151936	164802512	158989008	138139424	167813264	157178384	163292976	652558144	676465024	693382400	690186816	624384064	695797632
Glutamic acid	6076497408	6085327360	6673650688	5886077952	5674670592	6320527360	6158243840	5456891904	6047762944	6517124608	6483060224	6347637248	6788542464	6640654848	6428248576	6513598976	6502112256	6652732928
Gluconic acid	7093460992	7604849664	8230424576	7314241536	7003572736	7106760704	6340488704	5737888256	6387819520	6729443328	6588140032	6597298176	5756811264	6335567872	6374963200	5813723136	5541877248	5377632256
FA 9:2+1O	13057748	16614394	13888602	15953918	13810140	16583503	23675640	18000140	11438466	10534630	16401414	13867408	28675480	20258284	15770301	25173610	23190454	28910742
FA 18:4+2O	119365840	151258272	128358752	156246400	147298672	168219360	190547200	114834272	168090448	133283936	196196000	191689632	202923424	173649184	168401600	196090064	205800112	194955648
FA 18:4+1O	34317304	36504536	31046208	39618508	37494896	46298432	33466732	25222520	29669304	27086946	31832562	29229944	36751548	33592396	27860670	34993176	38699704	34135908
FA 18:3+2O	577443008	650785216	564055744	663329664	654990208	628584896	620321280	433486944	549642944	463263936	630590144	569993664	691414464	523623648	376728704	590718144	506197984	629380096
FA 18:2+O	19478402	19874620	11987064	19713696	21695144	16842618	15525889	23683804	14991363	17306148	12029438	10305865	15220329	11922335	10371958	15146001	14384950	12680539
FA 18:2+4O	38002760	42833104	39543616	46045408	47751772	41333976	36760168	25577878	27276774	28449042	27179252	25920076	46967200	42559844	40542652	49436920	48420676	40568112
FA 18:2+3O	208106016	292271904	230268544	238317616	245743856	238388048	247561824	217906464	268929408	232486688	214297664	238817888	236480688	240732928	211180048	253864912	236726096	220861280
FA 18:2+2O	1068739456	1144890752	967597056	1255759744	1244327680	1347726976	1074353152	846243904	1032602944	908687808	998525952	1241574528	1432188672	1079350784	1064992832	1332772864	1257916544	1291213440
D-Ribose-5-phosphate	204178752	160235056	210834384	158573232	169579968	171303984	175124096	176147104	161714720	143165728	154900784	173566848	163892288	169402576	160693584	164425152	153510352	133296048
D-Pantothenic acid	34507396	38111224	39577848	37442396	33986004	37082268	34427976	32851634	36681704	38315868	42711048	40487576	26335338	27422180	25570558	26901242	26611160	25288774
Dodecylbenzenesulfonic acid	219540768	273995648	161009296	142988016	160346272	193841120	284561376	131780880	204939504	217913632	159683792	222689696	116176984	142749024	183423568	152321616	130261200	331056608
Dodecanedioic acid	212506256	274787008	224142496	282620000	229112368	261848464	366480192	451306432	581644544	328974272	409144512	534304448	159013904	202778768	175654976	152350880	139213328	141405648
D-Mannose-6-phosphate	2626175744	2404874496	2735528192	2423881984	2571783936	2501754368	2581694720	2814089216	2531096320	2487634688	2460592128	2653489664	2688736000	2516031232	2505540608	2489619200	2507995136	2420687616
Dinoterb	14640174	17555716	7141086	7057067	6284633	43464392	9987825	41897128	10186083	14933259	75487376	21149356	12495000	7488676	13562025	9715263	8939036	8130553
Dicaffeoyl quinic acid	4902670	5589828	7158602	9026672	3830626	15320428	1542182	1832820	2064989	2750328	9448686	2157698	3561573	5386712	3640127	2469266	2783780	2069988
D-Glucose	167253216	144648704	164571088	190107504	82884824	80829352	117315024	107218296	153382144	83455304	204839312	162562352	72458200	72964104	53194500	92978824	183443056	142567360
D-Galactose	528535328	302649984	205664192	321891200	499280000	280458784	411840992	320400544	594932608	642569024	381302208	835547200	125645824	128624248	131775088	132084168	130355432	254465936
Dehydroascorbic acid	1730161024	1660967168	2196238848	1755770624	1855544192	1753677184	1850807808	2751962624	2678003200	2804402176	1795852160	2391618048	1130939776	1322790784	1495884032	1214206464	1256733440	887017856
Daidzein	2109669	1993402	3328837	3260672	2281000	2956865	1582878	2323518	2907328	1541073	1997170	2270292	19510008	2207541	1427709	1767773	1232117	1994994
D-(+)-Trehalose	49970572	31827528	36990908	103609728	69078424	87228328	91036568	78126048	24934964	36478112	24400552	75432936	134400800	75789624	78076696	71437528	140162304	41612172
D-(+)-Malic acid	9494693888	10018947072	10882288640	10570986496	9753558016	9405044736	7529778176	8249396736	10518975488	10182903808	9416064000	9086311424	3108632064	3614885888	3161326592	3069403904	3497427968	3000659200
D-(-)-Quinic acid	30900096	30541016	32171298	27431368	27326746	31923354	64185280	46210112	45363636	36960764	43119404	44735000	33465596	33000688	29177356	30078266	36399548	41587888
D(-)-Gulono-gamma-lactone	212023136	152880176	166862464	227408096	210969792	229786560	165729600	157583232	177729536	159458224	215913264	220860896	231251232	225668128	236405664	240159136	246394064	205589584
Cytidine	18291084	20383948	20461818	20073512	18549570	20084558	17438510	17346172	16667276	17777332	18577088	17244968	32433624	34359768	33703852	33226860	32801184	33953320
Coumaroyl quinic acid (isomer of 759, 760)	12784788	13486187	13873330	11860543	11402006	13709444	7341317	7220951	9294561	10584380	10026760	9843462	8343714	9535717	9744238	8682885	8110378	9424850
Coumaroyl quinic acid (isomer of 758, 760)	513658080	597830784	631170880	544337664	489497984	546682496	221412416	230965216	295992992	325873888	300038496	309680000	374880768	381956096	398569792	340338112	347509696	315878944
Coumaroyl quinic acid (isomer of 758, 759)	34579220	33323376	34758464	31586286	31127690	35337664	78054760	52047804	47014236	44830584	48111128	45576688	38059228	36473192	33491076	34693680	42102016	51194936
Coumaroyl Hexoside (isomer of 690, 691)	1568260608	1769151872	1776262784	1543130624	1548135680	1664118144	1210304384	1551530752	2044615040	1676833280	1748633984	1812075648	949555520	976512576	1003160960	896182016	885716608	790508800
Coumarin + 1O + 1MeO, O-Hex-Hex	45651580	49883288	52442712	48650244	41277816	41071532	27193936	30863090	34877012	34377772	36399132	30968948	87000504	125337912	109052616	97390936	98903480	80990080
Citric acid	18913357824	20999219200	20900655104	19920939008	18837377024	18372820992	26247864320	26253486080	31666245632	29797779456	26075523072	30256816128	4527141376	4247555072	4345762816	4154606592	4453335040	3726272000
Citraconic acid	356137952	392515392	423087296	388846592	367508256	364782592	495320864	525972448	593458944	606543040	556752960	574370752	165150928	164968240	170154416	162119936	164388480	147082032
cis-Aconitic acid	1176482048	1147182848	1506401152	1116068608	1158436992	1208993280	1216113536	1814863488	1840562432	1904808192	1208354944	1552484736	962433216	1106909440	1426766464	1192837504	1043555328	636633792
Chlorogenic acid; LC-tDDA; CE10	239837840	264909744	315383040	207712160	231040448	267666272	105355312	112786328	114862512	165937664	133455792	131048136	156040736	174942656	172664464	168101760	160782240	157637040
Canrenone	20340221952	11632739328	3227214592	2533108736	2639849728	3321186560	13393451008	8481057792	6019275264	7099644928	2457663744	5907189760	6658344448	1208225024	4347744256	3215087616	1534340480	10922641408
Caffeoyl quinic acid (isomer of 832, 833, 834)	214426672	245164160	281740480	196831936	205855664	234143264	153123728	156160000	174164928	215046544	200619424	213179824	134858944	172438608	171029680	129822440	132531160	119099504
Caffeoyl lysine	6191138	5879896	7224368	4840279	5873564	5851714	806828	728693	668151	868731	798799	784698	86800216	143774656	131773512	95445080	83710096	63454416
Caffeic acid; LC-tDDA; CE10	1825094912	2061937152	1988425088	1824096000	1789445504	1826459136	1124501504	1100727808	1296238592	1283812992	1243500800	1286815616	2254372096	2657949952	2527733504	2185467392	2147923968	2117170560
Caffeic acid hexoside	3860626176	4384406016	4194785792	3664220416	3750212352	3866473216	2372933376	2306404352	2657019392	2587289600	2595538944	2655592448	5370041856	6299062272	5916038656	4837069824	4971813376	5046219264
Caffeic acid	417510432	460996608	497608192	414444480	416004192	427826592	290336224	306851520	354950784	378837312	360107040	356716192	456986272	513568480	499119360	448786336	458777824	441683808
C12-AS (Tentative)	1588683008	1165017856	985636736	1367512704	892536000	967126976	2552312064	4060036608	2779452928	3676159232	2139164032	2248744448	1748779520	1221785472	1241616128	1440033536	3863295488	2949725696
C12-AE1S (Tentative)	813948544	501622112	314696768	324565408	318048416	347376736	687505088	1639488128	599714816	786770880	295691584	455972480	591668352	280062048	406013248	422202816	333357760	1204310144
C10-LAS (Tentative)	869032448	658476544	489270656	541239424	491767808	612894720	755647936	1389879424	663540544	790046400	623491456	512169408	724759104	497653728	525355200	567045760	533707456	949214656
beta-Hydroxymyristic acid	3314117	4386131	3105338	5176516	2483316	10245020	2910653	3866660	2666604	3375788	10228154	3729962	3851886	3355639	4171166	3475462	2279652	3587777
Beta-Alanine	8028859392	7920902144	8282211840	7665082368	7730179584	7781309952	7362927616	6920649216	6906976768	7007180288	7149124608	7036088320	9864806400	9941688320	9638844416	9948785664	9560827904	9699020800
Benzoic acid + 2O, O-Pen	50718252	61754532	60028596	51421164	49530352	50028748	55106308	36363488	37943592	36947316	35722776	40815328	30818708	28328392	29796266	26908648	28901584	32500812
Azelaic acid	1508516352	1789564672	1837777408	2214279424	1769711872	1823277056	1664626560	1309808000	1621882240	1125934080	1296741888	1488695680	1064625600	1095476480	959459968	1117974912	1032615744	1218465536
Aspartic acid	76761997312	74596073472	79788474368	73859891200	74662477824	74353090560	71253557248	67390455808	66131320832	68476837888	70291611648	68904304640	94410932224	95788777472	92062728192	93245440000	89924493312	92355280896
Apiin	0	77227	71755	0	0	49815	153188	41133	165693	0	36722	782293	99156	41874	33144	35746	8375792	0
Alpha-Aminoadipic acid	63116820	70466984	69197160	61056600	62529908	61170992	62047404	47992112	62720592	56567356	63921120	56962904	44553436	48894140	44894396	49431864	44442788	46220788
Allose	609583040	665450816	652742080	694879040	664157696	915851200	609498752	661289344	766949504	717518592	935044992	666277120	352302208	475362368	561297088	530324096	599209600	610919680
a-Linolenic acid	16036435	31281498	13916278	14821896	14484698	26243448	19565226	14579290	13077219	15511648	70711040	22625776	16665201	14502080	12204206	14393853	14166255	13541309
Alanine	35891820	45192896	42757596	41471936	41954360	46130312	38212784	35931980	31958862	35402544	39227560	38815972	31553810	33518812	34944264	31407582	56394700	59125372
Ala-Ile	9137803	12824652	6732383	8949294	11506830	10225868	13971842	22673562	12128661	21736932	17790022	15234136	23223762	20896690	19639182	21996004	21435870	20058230
Adenosine-3-monophosphate	259594416	203940448	237166608	263328224	301627616	194173536	217698032	105153336	152414624	129162608	168673504	140213680	125349744	133426872	132458608	154292336	132936752	114781616
Adenosine	70652640	74478800	69840752	67622344	66074372	65637704	41684524	49234184	44892572	40520116	45029304	44244264	75654936	70403400	69841352	74680136	72491960	68986832
Adenine	654910016	683247360	648665792	633726464	626104192	657941056	423905088	471336448	458211136	431500544	453198720	450083872	664321728	652056576	624588864	653843584	642212032	636902016
Aconitic acid	729724352	691976896	677744000	620922112	738603968	558468800	1064574656	1410609152	1637791104	1628789248	1516382080	1528902656	149816128	158389360	68656048	65383888	148298128	125966224
Acamprosate	7661784	4450088	3271913	2215126	2739274	35443812	3958268	2468120	8982251	4265661	31197824	3688848	3943870	2871628	16583048	4295436	2325594	23436740
9-HOTrE	52748720	59230900	53263872	48678076	65910628	68844720	117078632	48102680	62391216	52418820	54479240	64824292	73222056	57887940	49679836	63956364	55259004	51929756
9-HODE	121938416	150129872	114919424	137821104	147343088	183335680	275089824	157454192	176290368	151224880	223283952	216891616	182320512	149937664	133483176	169813120	171999168	167873648
9-Fluorenone	8687635456	9036810240	9087241216	8752684032	8736562176	9014441984	8466413056	8438070272	9009656832	8800634880	9129616384	8844673024	9152043008	9462648832	9093939200	9111153664	9016488960	8830738432
9-(2,3-dihydroxypropoxy)-9-oxononanoic acid	176489936	222242112	218032992	262775776	180735008	221032064	130164920	81045080	134491888	93918104	118329832	131934104	90288480	86111048	69574568	92132680	87510168	99260896
6:3+6O fatty acyl hexoside	80345720	82667864	92499544	99816400	95331896	73917808	61972116	63132540	67353136	59146936	56129320	60898116	93889344	107962040	106360432	105427040	101432048	83988976
6,7-Dihydroxycoumarin	4705050	7057162	6007164	16238717	6021806	15582271	32315430	49734900	9929708	7149108	25099828	9241300	21010656	23076248	18034960	18407386	27403112	28334076
5-Methoxypsoralen	8052251136	8145733120	8743340032	10581860352	7616342016	8558581760	8034918400	7660472320	8105381888	8167802880	8277994496	8329689600	6889582592	8233030144	7632338944	7264185856	8695241728	7676467712
5-Keto-Gluconic acid	4391254016	5285390336	5534157312	4780737024	4549975552	4618018816	3353434880	3475608064	3118766080	3864892672	3671458048	3832503040	4040880128	4159103232	4110139392	4155950848	3905188864	3674987264
5'-Deoxy-5'-Methylthioadenosine	7934810	7706247	8206954	7633221	7318882	8807577	11581926	9818397	10966058	10436749	12620822	11850435	17890180	16181475	16280769	17294760	16660956	16101471
4-Vinylphenol	1364103424	1458540800	1434129664	1469253632	1385776128	1421642880	928223296	1015722368	1158864256	1076549632	1061199488	1073226496	1043962432	1094928512	1016437888	1013487296	1005584512	1023914112
4-Pyridoxate	18520024	19647450	19722476	23169486	21000938	17106236	19254962	18277746	21218246	19531632	20844348	18600584	25768516	26330258	25226980	22889312	25452782	23114016
4-Nitrophenol	51271796	45319980	51710552	53131668	37346764	42085036	50566224	49726828	40130632	46971480	48336572	33937064	39756964	83769280	80540656	49338844	63366436	77339376
4-Nitrocatechol	9576714	10762369	7427675	20669486	5385793	19938820	12760691	11884830	6829478	6284892	16142933	7826002	7483970	52022808	55435040	8986976	18395914	10401883
4-hydroxy-benzoate	8982908	19588288	106298744	303202592	119387296	9263619	12568129	4580075	7879636	8975078	16701375	4499146	10305146	74603440	19477780	5727087	95720216	12271731
4-hydroxybenzaldehyde	45765460	130881040	116460744	110201872	98040176	105865168	107790392	112269200	119502840	117992136	79247344	125611168	126524192	136306176	140203024	91597832	123528568	129223256
4-Aminobutanoic acid	516591552	521038624	571731840	511259488	486324512	552135552	525795104	466827392	508759616	544006144	536606336	527046592	586299712	582950144	566509632	557000704	574320192	573476032
3-Phosphoglyceric acid	110193088	55798208	151711472	110430552	111073984	66507000	247601776	250902304	260916256	254986688	124272752	236437024	116397680	117017208	79627504	111210976	120041528	77138584
3-phenyl-2-[(2S,3R,4S,5S,6R)-3,4,5-trihydroxy-6-[[(E)-3-(4-hydroxyphenyl)prop-2-enoyl]oxymethyl]oxan-2-yl]oxyprop-2-enoic acid	4082114560	3311921408	3557366528	4688218112	3808480512	3936775424	2347388160	3335863808	3219568128	3393971712	2774616832	2689619456	2900334336	2568322560	2147625984	2236397824	2774050816	2145559936
3-hydroxybenzoic acid	71997032	67707072	87446600	117101064	75237104	179832608	86495944	80869880	55058028	33977684	145260208	80823632	71297552	138123936	93510504	68697424	78029464	109594032
3,4-Dihydroxybenzoic acid	11174655	7457588	13760922	15430470	10081482	9961939	13013019	12878224	8228253	7869050	11988486	8971388	7544274	36670344	12072668	5677664	12141808	17481782
2-Hydroxy-5-sulfobenzoic acid; LC-tDDA; CE10	7005386	4797949	5758700032	21255919616	6412135936	138777344	40779932	17778776	14949165	11648914	131453168	13653816	7318583	3609936896	149620432	11203456	5537495040	92099976
2,6-Di-tert-butyl-4-nitrophenol	193852624	130043104	131501320	136610464	116328928	112161696	199162704	157423312	147365120	169214112	123931608	148975664	132811776	154430480	268973408	187875552	135303392	211961088
2-(3,4-dihydroxyphenyl)-5,7-dihydroxy-6,8-dimethoxychromen-4-one	0	0	0	0	0	16432684	83123	0	0	0	13950488	0	0	0	0	0	0	0
1-O-b-D-glucopyranosyl sinapate	9836031	9991163	11037070	10768645	10580745	8861440	11465284	14478172	17139928	15666263	14780711	15392823	7325754	8604750	9071505	7236020	7613839	7481176
1-Myristoyl-2-hydroxy-sn-glycero-3-phosphate	33458716	43076244	25775854	35485564	36760524	31680738	55326632	62221776	42198528	46251140	43533828	46812380	69688096	62077288	53624288	71981944	71004040	54757668
13-HOTrE	167402128	191385008	143972576	183625552	173176176	189769904	147955328	139221728	152731248	141099328	138256160	188057040	234009392	189324896	174232032	220503632	207057168	213993456
10-Hydroxydecanoic acid	23445030	11346821	9465672	14446075	8631746	17103544	11932940	11964766	10111989	15118022	18185844	11993802	8302426	12117268	10580534	13481795	12431162	14478989
1,4-Cyclohexanedicarboxylic acid	29974382	31284580	29609838	22500198	27341908	20566048	22403944	19912230	22353220	30837952	26475838	23422208	21085520	28819018	21234582	28861450	17262790	25346586
[6-[3,4-dihydroxy-2,5-bis(hydroxymethyl)oxolan-2-yl]oxy-3,4,5-trihydroxyoxan-2-yl]methyl (E)-3-(4-hydroxy-3-methoxyphenyl)prop-2-enoate	29444324	38456000	36913720	31089550	30442370	32000804	14384254	11210277	12495603	12339515	11012651	12749943	25067842	23489944	21734402	24284678	23963812	22690912
(Z)-5,8,11-trihydroxyoctadec-9-enoic acid	1207207296	1707212800	1315746048	1736934528	1535806208	1976234752	2031667968	1407080576	1648052096	1556638976	1763633664	1930368768	2828290816	1865296128	2494956288	2769672192	2621097728	2545293056
(S)-Lactate	325879424	623269184	906421120	280396896	780292224	390540832	216623936	548206400	157949344	388736128	595855872	380521760	1061970496	844988736	833752448	712416832	1021632576	551282048
(E)-3-[4-[(2S,3R,4S,5S,6R)-3,4,5-trihydroxy-6-(hydroxymethyl)oxan-2-yl]oxyphenyl]prop-2-enoic acid	1027915584	1136754688	1148830720	1075414144	1010531712	1056475584	665922176	763856192	852714304	748562048	794042432	791999168	843047232	872168576	838351040	774987904	761166784	802800320
(1S,3R,4S,5R)-4-{[(2E)-3-(3,4-dihydroxyphenyl)prop-2-enoyl]oxy}-1,3,5-trihydroxycyclohexane-1-carboxylic acid	1222069888	1310423552	1561359872	1091391232	1189913216	1268189568	631025344	729674944	826281664	1075968128	825105088	908260864	847328000	960638976	1005144448	801483776	862091712	681218368
Valine	780895040	872464704	802740544	983548480	840013120	874221056	992302784	1006695232	998773376	1092752512	1020611200	900964544	1532241280	1540477952	1442995840	1490743680	1555900160	1407766784
Uridine monophosphate	33371796	33591084	29294414	32622082	34935180	32779000	35303244	29467552	27085616	30412954	32553052	30522026	21987696	21766202	20467798	25936000	22865240	18611002
Uracil	738524032	829741952	845343232	803122752	767508352	790354240	775671232	872846784	816715712	828351808	823029760	827224640	947293696	1000710656	921119232	947148032	986193728	868077952
Tyrosine	255008880	281089984	256080272	288982528	259253024	269341856	237739392	270493312	248701520	278238592	264541984	218372640	588554176	620470464	598346880	581580800	590396288	561937280
Turanose	2855469568	2766577152	1565501056	1432953600	2809506048	2816924672	1574699904	1315714560	2623066368	1472194944	1466476800	1351307392	1345571200	1314792064	2307874304	1447023616	1181894528	1269486720
Tyrptophan	146431408	181023200	181553840	164997040	151980672	165478848	335579264	374762176	363091552	419411936	362712736	353987104	705004992	779192768	763614208	686854336	735663040	673136576
Tryptamine	779066048	795146880	749490112	789252416	766519680	741394048	547153792	492690112	531916736	458741664	416802560	468749248	1686313088	1583172864	1556990592	1773058688	1687410048	1643569408
Triphenylphosphine oxide	553858624	543373504	615251648	608745088	597730944	619926528	555036800	529390560	578159296	615046080	573317440	603329344	520734464	565103296	494960288	514406592	574953856	496356032
Tri-isobutylphosphate	28359438	30535778	29477848	28324228	30245532	28268390	29770264	28282012	31439858	27332496	28733054	29403206	31161692	30214052	32116116	30383266	30027568	29525732
Trigonelline	292660864	249942384	309385984	263004016	288241984	266262176	137377216	190510912	179994560	173857680	190855712	198324848	193465792	208807824	195779232	194749168	180348784	197718704
Trans-caffeic acid	219199424	245856864	230148464	203992800	201430160	222562288	144295344	147064544	182406112	174684352	182545200	198714304	256997184	262577408	245622128	245739344	229341760	231305664
Sinapoylmalate	22196344	22544554	22404276	23303498	19878964	23535564	13825970	13233472	15015581	14316644	15204504	14534155	26444278	30537786	28240902	27662036	28670980	26400868
Serotonin	1084101760	1046056192	1015057856	1011655744	1077532544	1044730752	908003968	773047744	866143552	890175552	810345408	808617152	876643200	866867392	806593728	886703424	921348096	799702592
Sarcosine	497373088	558300032	538945088	554831232	508850016	526208096	488612288	536046112	506321600	478780064	484195488	468022080	804042112	814337088	752564416	743160704	790387648	734009152
Rosmarinic acid (not validated)	948972224	1002838080	1256640896	920042880	963642880	946618304	529174240	589489664	607455552	857371648	727005376	744308544	553162112	659067968	688768320	477063648	644034688	482506432
Pyrogallol	6064262144	5949477888	5983149568	5873222656	6068106240	6191608320	5733070848	5759973376	6209467392	5857802752	6047114240	5877308928	5412052992	5238032896	5153414144	5251913728	5354371072	5115124736
Pyridoxal [M+H-H2O]+; AIF; CE10; CorrDec	72373592	85052024	66820976	74560888	72149448	70029456	58456388	65187716	80303800	73302936	71239224	74951712	76171568	81163168	78414912	80599568	71236528	71108952
Proline	7146778112	7202485760	7035167744	7019640832	7219003392	7340462592	3678506752	5477075968	5562254848	4294866176	4562269696	4546900480	7048197120	7442190848	7117691392	6968852480	7068209152	6641142272
Piperidine	793929728	871311616	824671296	826191680	803789632	887301376	938547008	934025216	868419008	1005581504	1032967360	898489280	2163408896	2149317888	2151195648	2121471616	2093896576	1990590464
Pipecolic acid	30393223168	31289126912	33175269376	30851067904	30431483904	31382872064	24853004288	24307593216	25157101568	24054233088	25046185984	25483743232	41515204608	42963808256	42126225408	41463861248	41140023296	41099161600
Phthalic anhydride	419833568	414541664	453347232	348263072	391810560	398515200	371641888	360146016	383581024	406075168	395532064	358865280	419042528	378116672	416017312	458345440	416623392	386774720
Phenylbenzimidazole sulfonic acid	81180488	89631616	85131432	77223128	69683984	88133728	6330059	4444194	7082861	13335043	5040988	4054872	1624841	2761911	340429	5878331	2909132	3730941
Phenylacetaldehyde	3743379968	3819539968	3927057664	3577502208	3617344000	3789419264	2824753920	3090748416	3207207936	3380857600	3150327808	3058457600	5435372032	6288250368	6358511616	5707436544	5655516160	5556625408
o-Toluidine	92868960	99284920	109216456	85001608	80401304	86062888	98050336	64038304	91743272	85071864	97101184	95169768	96128264	65156744	98718448	107689648	110784160	88755752
Ortophosphate	1867017344	1916817792	1798759296	2012710912	2056718080	1762002688	3090655744	3652558080	3692746752	3224469504	2766499328	3331426048	1801730560	1891999616	1910125184	1885876096	1797645824	1555353088
O-Phosphocholine	1023730176	951611968	1111789696	1017525632	1108304000	923459328	1301564288	1421922560	1510970752	1379352320	1322571392	1428020992	433616256	457788960	425428800	449140480	451338048	321423104
O6-MeG	19828638	23232984	18417442	19076870	19660590	20475266	19661540	19742816	23624658	22067904	23887592	20159016	23349484	24766462	23921134	21316338	21734548	19214666
N-omega-Acetylhistamine	53004420	48736188	43452000	53787168	46056648	56897348	9027531	6271634	5297805	9067138	8385380	7472960	26594612	26077322	20112000	30917372	29714510	25100502
Nicotinic acid	566076032	528104960	535870624	530367648	593753280	566355712	471948768	424823296	457839744	438655968	478984096	461036768	511971712	447100352	473175808	502865056	448094080	471005472
Nicotine	83039104	97212520	101623832	99296712	101549312	92925000	85112048	89593272	94647920	92597944	93179960	50607608	102290592	102486856	112633824	108266504	113162792	99841256
Niacinamide	257595792	255820464	267480528	326967264	268552832	251277024	558203072	404634336	514644928	299048000	306990688	321458880	206750352	248968464	261768544	223031520	373388416	269657152
Nepsilon	559303808	576755008	617270784	529111360	622278080	578034304	560365760	570979328	584767680	609518464	608834688	614186752	807228416	851943680	818524672	810353216	786879936	762268992
NCGC00386020-01_C18H28O3_8-{(1S,5R)-4-Oxo-5-[(2Z)-2-penten-1-yl]-2-cyclopenten-1-yl}octanoic acid	141278752	134504624	106220064	107402984	114599992	117113672	71198528	91657576	73988680	93231392	61241048	82342240	163842784	104248008	101363136	126959048	122618216	113637208
NCGC00385811-01!6-[3-[(3,4-dimethoxyphenyl)methyl]-4-methoxy-2-(methoxymethyl)butyl]-4-methoxy-1,3-benzodioxole	574457856	635631232	605495616	640271232	463207520	585642880	681027648	475963296	493131456	524846624	2420392704	565906944	298356608	572889792	567217792	576885824	518022560	555903744
NCGC00385291-01_C19H30O8_3-Buten-2-one, 4-[4-(beta-D-glucopyranosyloxy)-2-hydroxy-2,6,6-trimethylcyclohexylidene]-	16450426	20532996	18885692	18572148	17006944	18430206	15791100	15128315	16331296	17252698	15218752	16590477	24003268	25932724	26923218	22506630	22545150	21460154
NCGC00385000-01_C15H18O8_beta-D-Glucopyranose, 1-O-[(2E)-3-(2-hydroxyphenyl)-1-oxo-2-propen-1-yl]-	124174840	124527496	137199296	106731360	123920936	131866032	89626856	100108944	109946240	113888784	111183816	104983944	116510736	110519976	106358328	104926720	110014288	97755240
NCGC00384821-01_C16H18O8_Cyclohexanecarboxylic acid, 1,3,4-trihydroxy-5-[[(2E)-3-(4-hydroxyphenyl)-1-oxo-2-propen-1-yl]oxy]-, (1R,3R,4S,5R)-	77582744	84954664	89079976	79234272	73841840	84784352	33698176	36809288	43757560	46676980	42994776	45636324	51725012	51632048	53186640	45508224	46013860	44438172
NCGC00380355-01!(7E,13E)-9,15-dihydroxy-4,10,16-trimethyl-1,5,11-trioxacyclohexadeca-7,13-diene-2,6,12-trione [IIN-based on: CCMSLIB00000848984]	34405876	39212600	40469756	35231980	33341174	39374280	12928836	5478607	5784510	6870261	7343181	6613212	1930156	2849693	2234900	2014581	1851070	2132797
NCGC00168941-08!(1S,3R,4R,5R)-3-[(E)-3-(3,4-dihydroxyphenyl)prop-2-enoyl]oxy-1,4,5-trihydroxycyclohexane-1-carboxylic acid	73633808	74318520	89869112	65751628	73257552	74230200	39569976	44351260	45131612	60537516	51096992	55740748	43399212	51307924	53396872	40152488	48870224	37575584
Nandrolone	84207552	96205760	85715496	91851344	81989272	116905504	82064896	57108844	67572424	69425312	68001584	77048240	68021072	72294216	75294384	78052088	68544624	90679960
N-acetyltyramine	67418712	72242224	74660520	66111376	62647884	71939728	43602032	48445304	48595936	46014300	42837088	46246644	89781504	102802288	93203816	86370960	87190432	85254824
N-Acetyl-histamine; LC-tDDA; CE10	124653544	126980880	118894152	117154128	129332112	121613928	23508080	10534587	13990160	16809310	15924009	18478472	63027696	65898192	62965484	61232904	60696036	62949620
N6-Methyl-lysine; LC-tDDA; CE10	130562504	136666368	131061128	126471712	131355672	132845400	42782420	47888996	45281076	53531188	50660096	51699052	65185588	63880188	58494000	61382464	61781952	59544196
N-[3-(Dimethylamino)propyl]dodecanamide	1003592320	510481408	91870376	66024132	108602088	112013656	953115392	2165351936	361596544	1027207424	163730880	324088736	855236224	27534248	487607872	615001984	58229516	1603820288
N,N-Dimethylglycine	477548448	510454848	400992480	479448544	505840992	454799488	496175968	634431168	524805664	578284608	535169440	552165248	749888960	765911552	697242112	750213504	794934208	692762368
N,N-Dimethyldodecylamine N-oxide	173081520	157307072	204113552	180688336	201670960	319438464	235245744	215830160	213027520	233669024	339197792	249407680	216961312	280016640	333351392	263088000	290690432	249694352
Morpholine	46573744	56899812	48225612	89589464	34171376	41218744	60307472	88880232	42160304	58071144	45892836	32446208	47607448	26387364	43530432	48975452	40547552	47595108
Methionine	519470240	609435520	557674880	506743680	536892032	518846528	728536000	785667840	755151168	823608768	680940416	795335552	571160448	584854528	590329984	565996672	606993472	553666432
Melibiose	1615589888	1430287872	1410591104	1393983232	1501477376	1420701824	1372726656	1211241088	1428068480	1288153088	1362147712	1399254528	1396656512	1343250176	1380467200	1461948928	1382763648	1383553920
Melezitose	208347328	188680720	189468496	185157712	198644240	191423040	169344640	167696224	192768544	175254480	173605440	176652688	158482736	145808992	134312752	144880560	135873648	132130240
maltotriose	155263152	143991280	133560312	128611112	132980248	142968528	124552480	141834144	144129360	133627048	122313568	148080320	119047832	107820040	105270064	109350368	110183528	95340088
Maltol	291567168	476699296	464873984	325461824	778113472	418028896	676907584	662656320	716138240	682193792	447307008	508865024	284727456	418729216	331016224	530207712	438075808	592809536
LysoPC(0:0/18:0)	37140088	51735496	35281824	59003116	58260480	46977952	41416356	40579624	51534724	56697180	39926660	50621588	24005106	33532038	25694568	30739234	29764378	29009790
Lysine	319250368	345021376	344283200	328541344	333321824	335361632	421071552	372163200	328479200	440007232	363764672	366724032	1414966528	1346801664	1264847488	1343611904	1342903808	1349151104
L-serine	419680896	465153664	408841568	491401600	501882304	425194112	1102480640	1586454016	1334318592	1614144000	1543588864	1391462912	1553871232	1471747968	1489494144	1467669632	1488959104	1439864448
L-Norvaline	268807296	281048352	265614832	278645280	278982752	272893248	302089408	330521696	286213792	313484736	320517728	306101472	511202496	542584704	484576288	517924992	507689984	482943136
L-Isoleucine	1383930752	1469797248	1404221440	1449288192	1319359104	1410813056	1565459712	1579048320	1576726912	1674532864	1648886656	1548321664	3659436288	3839403264	3654159360	3640449792	3806123264	3538998528
L-Histidine	637372864	640072704	678049536	446605760	627965952	626541440	642778688	605119168	603195392	678279808	405733728	627967104	1367696128	1384451072	1349410816	1378917248	1360823040	1320466560
Leupeptin	24840314	24033336	19957256	18571698	21370524	97219152	26241452	27570040	24295330	19874316	56084056	28897234	18600482	15214036	20242060	24038800	18959462	38541500
Lauryldiethanolamine	2180587264	2631384064	2810739456	2809426944	2657194752	2491637760	5290831872	4332107776	5299398656	4752997376	6937301504	5301894144	4900759552	6355658240	6145462272	6080569856	6606917632	5544142336
Lauramidopropyl betaine	36258252	37709112	39976620	62122304	38396436	55587984	48185712	42208072	53103148	44323700	46173780	48546544	30815952	39244716	45658064	40319336	57165536	58854104
L-Arginine	1579302528	1672833664	2025734400	1703598720	1677167360	1651038336	2568439040	1833995904	1837045632	2630152448	2146914688	2344049408	10461044736	10071979008	9777753088	10428425216	9999715328	9729162240
Kojic Acid	323291648	293789152	294409120	301445792	340402304	306473856	355180608	350000384	353446688	357752832	355657056	393545664	331692960	298706496	374710720	309503776	290274016	281730848
Indole	27357676	31765920	34347692	29123710	27753542	33119338	50944868	52061464	47678944	57127940	56009416	56121352	88022032	95527248	98069712	90357632	88405000	83599504
Hypoxanthine	32610936	40747660	37153376	30049178	30272922	58217008	19646660	18914086	17865768	23908290	28561234	17809436	22037162	21822600	22457390	20757644	22904546	18410614
Homarine; LC-tDDA; CE10	39372976	38978772	40608864	30536682	33914800	42057396	27845198	18975148	19152886	18117022	26272910	24812732	30225096	28106602	22337580	26144184	22277092	22810450
Histamine	2520395776	2325458944	2382084096	1911845376	2411457536	2395730176	147250912	62326916	120968960	143797600	71792128	96457360	1067273216	1045889664	987894464	1109076480	1055834432	1046513984
Glutamylleucine	43701508	45759800	37977588	40219868	42757064	39997704	37190448	51078264	34068668	36728212	33032810	34327720	44150272	40366292	35875304	40507852	40639876	40690728
Glutamic acid gamma methyl ester	275709152	287670656	264144416	249245776	258488528	271324160	360369024	305906688	353058112	394514880	327566912	354910880	263332816	275683584	272312160	283287680	252247408	257788144
Galapagin	18143330	21922294	22166382	21872738	21406534	24173888	34077968	24228254	29600944	34138644	30907100	36394480	21649620	19170026	20694522	22886934	22191628	21517908
Ferulic acid	17809100	21460134	22471572	18221746	17903276	18285594	9723192	10210677	12586164	12159203	12521771	14182434	11052938	12883041	11752215	11043986	11842286	10809605
Erucamide	543920448	772107584	581636288	557903104	452971552	686621312	538667712	572075264	479478560	697111936	640027392	668130112	563874112	734628032	717198848	537366656	592420096	754670208
Epigallocatechin	410313184	385941280	488277728	333859904	414617888	374513088	381589088	405635488	399914432	442805280	501993152	529613056	510671520	506837792	508383936	463629408	522188384	473470144
D-ribo-Phytosphingosine	47603836	53351660	51518684	74491760	73541504	57195392	135803872	98126856	130697528	121861232	286323776	204039216	70924392	56885836	116085872	78327712	129017832	88778856
Dioctyl Phthalate	22099816	25274324	19685276	35565512	18756980	25298526	20409734	25012418	18450224	20251808	19054624	19163300	22848874	30070962	25394662	20786296	37036112	22517992
Di-n-butyl phthalate	350645440	331023840	359933408	267196304	328342112	310752736	322988000	289300256	314993536	334256320	328020128	299696064	372134016	331251968	338517568	385636032	340730912	319179040
D-2-Aminoadipic acid	268909024	306527456	328064064	277283616	291724096	280500128	318382432	292918208	322057152	340259232	350931040	345830144	211675248	230166816	193327200	195054432	220615216	206052864
Cytosine	1162270208	1179693824	1184096640	1192229248	1213421952	1197796352	1206216064	1158487168	1187513984	1256206592	1285699968	1229594112	1568789248	1674399488	1541557504	1558288896	1518565248	1601548928
Cyclohexanamine	256542560	304670240	298310272	285438528	294753696	306358464	309777824	301799168	313842880	305301920	333679616	316537696	214701968	247798528	240350448	206282592	254894432	247785312
Cyclo(Leu-Pro)	79325528	135426800	35620628	136061696	132974656	74401096	44058812	40928076	55569016	63574940	87760272	197194496	111092208	80197648	85472888	109321632	84269752	114057920
Coumaric acid (isomer of 189, 194)	57274224	59407940	56343484	50636240	49447232	59139312	36948092	35269824	40646368	39385268	42476476	41851592	36854560	37456144	51261232	37706004	38690236	39870460
Clobazam	44210924	49342112	46943816	56973072	45091316	40679836	37854772	52447504	40518940	47679780	39714336	40646872	55181292	73161080	59701004	51405212	48066420	54278200
Choline	331418976	393538176	390736416	487001120	497200608	400026592	343839744	395684192	394543040	407938368	384968736	411273792	277321088	388849632	315589440	361629696	314074752	349783424
Betaine	388312352	429256352	419281632	1190874624	370859552	543795328	911461952	864467904	745192960	1003976704	901929600	762229632	213548656	346803072	227443744	254060656	678945792	282435456
Avobenzone (Parsol 1789)	67443280	67527616	51360676	53190428	24472862	57152916	13285220	8598024	23317824	294820896	14399069	14590009	13935143	8371423	5429770	8337854	31536728	10633032
Asparagine	897382848	964500544	1080715136	1071809088	1018657344	951686400	880700032	793997376	685439552	878430208	932384192	994426432	2651777792	3172456704	3170640640	2841852672	2694017024	2696903680
Arginine	16247764	19112666	18370320	18144134	18118036	17953120	9285429	9422718	8965289	9406642	9122452	10908641	16189830	15529929	13645181	13681316	14052197	13437398
Aniline	199734240	233790400	424887648	387986752	234549904	183307504	212332288	198845056	259074816	120836136	178473456	234330432	126337232	123851784	238669088	192983088	379716224	360991456
alpha-Solanine	6838807	4127163	3661421	3073705	4368684	3791311	6192382	4721432	5765574	4179666	3151548	3844604	7014181	6357258	5622874	6783634	6765849	5349646
Acetyl tributyl citrate	68068776	59204492	59608536	61355016	61418604	57182124	62438136	51407376	59529360	55017032	52343892	53272300	83969328	66101768	70206072	73600752	68188056	70057672
5'-Methylthioadenosine	1917272832	1924287744	2019724672	1889952640	1989938304	2117509376	2580695808	2393044224	2447941120	2480882176	2457396736	2555247616	3266425088	3369075456	3162542080	3045027840	3045518848	3043844608
4-Methylphthalic anhydride	71614544	84050800	69700408	76291024	65100480	90412128	76294328	69255296	70822080	78783040	78024480	77736088	69966984	73866416	78562856	66085712	63455836	79626504
4-Isopropylaniline	535444320	659135360	377030528	387832096	351247872	384711072	348168896	532795136	657879488	273140576	581937856	390414272	422678240	610900864	630355136	624157824	387642240	616376192
3-Indoleacetic acid	55596020	55268092	51813936	55425576	55941184	54547392	46310476	39540208	43963004	45972600	43866792	40210156	43944496	46382624	41680888	45330372	46135708	40552836
3-Hydroxycinnamic acid	18234860	17970846	17399722	18304822	17804548	18887216	7878966	11253313	18665532	8662856	6081217	7891442	24410646	10956872	11050405	15532967	14551582	22504864
3-Formylindole	42422908	49541096	42382648	52309148	42938432	48230116	66179644	67132176	72881136	80084696	66252064	64185172	123071360	148746960	146012176	120319952	128648320	128097464
3,6,9,12-Tetraoxatetracosan-1-ol	127731368	110051488	41944288	63555468	50938824	54563772	140097088	164144784	70935344	93239040	51706384	75425608	194966736	41401016	78472288	77696808	60993124	114710432
2-Naphthylamine	6369312768	6510878720	6221839872	6546138624	6470411776	6310929920	4708740096	4232271616	4534263808	3751326720	3594948096	4032185344	13234924544	12540890112	12159175680	13839634432	13380302848	12934127616
2-Methylindole	30562230	32465328	30758046	32614328	31177382	31911368	23392830	19603700	22579340	17406322	17204656	18925426	70983512	67028480	64194960	73966648	72626936	72421224
2-Hydroxybenzonitrile	38561016	38790956	37291584	37192932	34315336	37422000	36313856	33736960	41156868	35303424	34623572	36128172	37874676	35861896	35227488	34208064	37530244	35507300
2'-Deoxyguanosine 5'-Monophosphate	436453344	347563360	383299840	336241888	481687328	341810016	325109312	134090824	259420864	188173056	256087696	232007744	159945744	167503344	155578256	185746768	158113360	141338016
2,6-Xylidine	1912054400	1671889024	1831143168	1009324416	1778517760	2251360768	1647515264	2115409280	1131383680	3041243136	3617023232	1366747264	1006787520	1879379584	2039217792	1351509120	1828671232	1691616256
2,6-diisopropylaniline	131779608	119443312	100902592	132092936	108902440	96762304	118873096	103741472	102822616	128499872	120504968	159668752	94773920	108547424	158253936	128518336	132790512	140056512
2,4,6-Trimethylpyridine	30819272	9439697	38987096	32022938	33035520	28676204	23519262	7795063	20632022	18764208	8139818	8421876	8651951	30794406	25236088	9816772	10609042	27873106
1-Dodecyl-2-pyrrolidinone	33610760	24359054	13648080	7701144	10747462	17136832	38219388	55696704	19043658	29773012	14550454	21999990	38450032	11287273	25625042	24941710	12462601	47176956
1,6-Anhydro-b-Glucose	241572032	242447936	234670784	235185808	243976912	260939632	130836904	230158128	132506512	120115928	132626328	131377712	201879888	194481824	185247616	196604464	202344640	196197920

## Sheet: S2
Name	Class	HaiDong_1	HaiDong_2	HaiDong_3	HaiDong_4	HaiDong_5	HaiDong_6	WuWei_1	WuWei_2	WuWei_3	WuWei_4	WuWei_5	WuWei_6	JiuQuan_1	JiuQuan_2	JiuQuan_3	JiuQuan_4	JiuQuan_5	JiuQuan_6
2-Methylindole	Alkaloid	30562230	32465328	30758046	32614328	31177382	31911368	23392830	19603700	22579340	17406322	17204656	18925426	70983512	67028480	64194960	73966648	72626936	72421224
2-Naphthylamine	Alkaloid	6369312768	6510878720	6221839872	6546138624	6470411776	6310929920	4708740096	4232271616	4534263808	3751326720	3594948096	4032185344	13234924544	12540890112	12159175680	13839634432	13380302848	12934127616
Betaine	Alkaloid	388312352	429256352	419281632	1190874624	370859552	543795328	911461952	864467904	745192960	1003976704	901929600	762229632	213548656	346803072	227443744	254060656	678945792	282435456
Cyclohexanamine	Alkaloid	256542560	304670240	298310272	285438528	294753696	306358464	309777824	301799168	313842880	305301920	333679616	316537696	214701968	247798528	240350448	206282592	254894432	247785312
D-2-Aminoadipic acid	Alkaloid	268909024	306527456	328064064	277283616	291724096	280500128	318382432	292918208	322057152	340259232	350931040	345830144	211675248	230166816	193327200	195054432	220615216	206052864
N-acetyltyramine	Alkaloid	67418712	72242224	74660520	66111376	62647884	71939728	43602032	48445304	48595936	46014300	42837088	46246644	89781504	102802288	93203816	86370960	87190432	85254824
Tryptamine	Alkaloid	779066048	795146880	749490112	789252416	766519680	741394048	547153792	492690112	531916736	458741664	416802560	468749248	1686313088	1583172864	1556990592	1773058688	1687410048	1643569408
4-Aminobutanoic acid	Amino acids and derivatives	516591552	521038624	571731840	511259488	486324512	552135552	525795104	466827392	508759616	544006144	536606336	527046592	586299712	582950144	566509632	557000704	574320192	573476032
Arginine	Amino acids and derivatives	16247764	19112666	18370320	18144134	18118036	17953120	9285429	9422718	8965289	9406642	9122452	10908641	16189830	15529929	13645181	13681316	14052197	13437398
Asparagine	Amino acids and derivatives	897382848	964500544	1080715136	1071809088	1018657344	951686400	880700032	793997376	685439552	878430208	932384192	994426432	2651777792	3172456704	3170640640	2841852672	2694017024	2696903680
Aspartic acid	Amino acids and derivatives	76761997312	74596073472	79788474368	73859891200	74662477824	74353090560	71253557248	67390455808	66131320832	68476837888	70291611648	68904304640	94410932224	95788777472	92062728192	93245440000	89924493312	92355280896
Beta-Alanine	Amino acids and derivatives	8028859392	7920902144	8282211840	7665082368	7730179584	7781309952	7362927616	6920649216	6906976768	7007180288	7149124608	7036088320	9864806400	9941688320	9638844416	9948785664	9560827904	9699020800
Glutamic acid gamma methyl ester	Amino acids and derivatives	275709152	287670656	264144416	249245776	258488528	271324160	360369024	305906688	353058112	394514880	327566912	354910880	263332816	275683584	272312160	283287680	252247408	257788144
Glutamine	Amino acids and derivatives	291883392	283778720	270530944	300292864	295544256	300151936	164802512	158989008	138139424	167813264	157178384	163292976	652558144	676465024	693382400	690186816	624384064	695797632
Glutathione (oxidized form)	Amino acids and derivatives	74669824	65869000	99036848	72235424	84387624	72521120	67120944	84546216	81496160	89717952	97653496	94603912	126644360	112731568	122755552	121139016	126735392	96865536
Histamine	Amino acids and derivatives	2520395776	2325458944	2382084096	1911845376	2411457536	2395730176	147250912	62326916	120968960	143797600	71792128	96457360	1067273216	1045889664	987894464	1109076480	1055834432	1046513984
Histidine	Amino acids and derivatives	265667584	278750496	279107936	288159200	274662400	281302528	272193632	245243296	232760208	252981808	236815968	241768064	645563840	652270400	637833792	663712896	634264512	620891776
L(+)-Arginine	Amino acids and derivatives	200919104	223386768	265134928	220310528	220623376	215937472	310895904	225106416	225011312	317573312	269148448	277582400	1316434432	1314088832	1248246784	1330693120	1266075008	1258306688
L-Histidine	Amino acids and derivatives	637372864	640072704	678049536	446605760	627965952	626541440	642778688	605119168	603195392	678279808	405733728	627967104	1367696128	1384451072	1349410816	1378917248	1360823040	1320466560
L-Isoleucine	Amino acids and derivatives	1383930752	1469797248	1404221440	1449288192	1319359104	1410813056	1565459712	1579048320	1576726912	1674532864	1648886656	1548321664	3659436288	3839403264	3654159360	3640449792	3806123264	3538998528
L-Norvaline	Amino acids and derivatives	268807296	281048352	265614832	278645280	278982752	272893248	302089408	330521696	286213792	313484736	320517728	306101472	511202496	542584704	484576288	517924992	507689984	482943136
L-Tyrosine	Amino acids and derivatives	43654764	41190240	42124428	53290284	46464312	44656068	39441548	50967956	50748136	54745044	48266124	43422088	75148272	71021088	71643888	78667432	77258040	74588192
Lysine	Amino acids and derivatives	319250368	345021376	344283200	328541344	333321824	335361632	421071552	372163200	328479200	440007232	363764672	366724032	1414966528	1346801664	1264847488	1343611904	1342903808	1349151104
Methionine	Amino acids and derivatives	519470240	609435520	557674880	506743680	536892032	518846528	728536000	785667840	755151168	823608768	680940416	795335552	571160448	584854528	590329984	565996672	606993472	553666432
N-Acetyl-histamine; LC-tDDA; CE10	Amino acids and derivatives	124653544	126980880	118894152	117154128	129332112	121613928	23508080	10534587	13990160	16809310	15924009	18478472	63027696	65898192	62965484	61232904	60696036	62949620
Nepsilon	Amino acids and derivatives	559303808	576755008	617270784	529111360	622278080	578034304	560365760	570979328	584767680	609518464	608834688	614186752	807228416	851943680	818524672	810353216	786879936	762268992
N-omega-Acetylhistamine	Amino acids and derivatives	53004420	48736188	43452000	53787168	46056648	56897348	9027531	6271634	5297805	9067138	8385380	7472960	26594612	26077322	20112000	30917372	29714510	25100502
Phenylalanine	Amino acids and derivatives	18761774	22180796	19141280	23703906	18261314	20858418	22030748	22487884	19878604	28050286	26408970	20400460	44163380	48477392	46470640	48242300	46596300	41685948
Pipecolic acid	Amino acids and derivatives	30393223168	31289126912	33175269376	30851067904	30431483904	31382872064	24853004288	24307593216	25157101568	24054233088	25046185984	25483743232	41515204608	42963808256	42126225408	41463861248	41140023296	41099161600
Proline	Amino acids and derivatives	7146778112	7202485760	7035167744	7019640832	7219003392	7340462592	3678506752	5477075968	5562254848	4294866176	4562269696	4546900480	7048197120	7442190848	7117691392	6968852480	7068209152	6641142272
Pyroglutamic acid	Amino acids and derivatives	694512832	731309312	1183939584	1152436992	976155200	742682176	578559424	541250688	522409312	533039872	535158496	581533120	2551702528	2852656128	2668867072	2699008000	2702879488	2592725248
Sarcosine	Amino acids and derivatives	497373088	558300032	538945088	554831232	508850016	526208096	488612288	536046112	506321600	478780064	484195488	468022080	804042112	814337088	752564416	743160704	790387648	734009152
Tyrosine	Amino acids and derivatives	255008880	281089984	256080272	288982528	259253024	269341856	237739392	270493312	248701520	278238592	264541984	218372640	588554176	620470464	598346880	581580800	590396288	561937280
Valine	Amino acids and derivatives	780895040	872464704	802740544	983548480	840013120	874221056	992302784	1006695232	998773376	1092752512	1020611200	900964544	1532241280	1540477952	1442995840	1490743680	1555900160	1407766784
(Z)-5,8,11-trihydroxyoctadec-9-enoic acid	Lipids	1207207296	1707212800	1315746048	1736934528	1535806208	1976234752	2031667968	1407080576	1648052096	1556638976	1763633664	1930368768	2828290816	1865296128	2494956288	2769672192	2621097728	2545293056
13-HOTrE	Lipids	167402128	191385008	143972576	183625552	173176176	189769904	147955328	139221728	152731248	141099328	138256160	188057040	234009392	189324896	174232032	220503632	207057168	213993456
6:3+6O fatty acyl hexoside	Lipids	80345720	82667864	92499544	99816400	95331896	73917808	61972116	63132540	67353136	59146936	56129320	60898116	93889344	107962040	106360432	105427040	101432048	83988976
Dodecanedioic acid	Lipids	212506256	274787008	224142496	282620000	229112368	261848464	366480192	451306432	581644544	328974272	409144512	534304448	159013904	202778768	175654976	152350880	139213328	141405648
FA 18:2+4O	Lipids	38002760	42833104	39543616	46045408	47751772	41333976	36760168	25577878	27276774	28449042	27179252	25920076	46967200	42559844	40542652	49436920	48420676	40568112
Glycerol 3-phosphate; LC-tDDA; CE10	Lipids	993697536	953213184	990676800	913540544	914329920	965830592	1454287744	1343666816	1250568960	1117213312	1202138496	1220129408	761731840	729662656	680802240	763401024	698310208	694272128
LPE 16:0	Lipids	49534276	57169508	47244884	84825856	78573872	59574268	49133680	75178208	68955192	72034192	56860196	71615280	29543918	46865140	35065640	45742200	36580072	41743848
LysoPC(0:0/18:0)	Lipids	37140088	51735496	35281824	59003116	58260480	46977952	41416356	40579624	51534724	56697180	39926660	50621588	24005106	33532038	25694568	30739234	29764378	29009790
NCGC00385291-01_C19H30O8_3-Buten-2-one, 4-[4-(beta-D-glucopyranosyloxy)-2-hydroxy-2,6,6-trimethylcyclohexylidene]-	Lipids	16450426	20532996	18885692	18572148	17006944	18430206	15791100	15128315	16331296	17252698	15218752	16590477	24003268	25932724	26923218	22506630	22545150	21460154
NCGC00386020-01_C18H28O3_8-{(1S,5R)-4-Oxo-5-[(2Z)-2-penten-1-yl]-2-cyclopenten-1-yl}octanoic acid	Lipids	141278752	134504624	106220064	107402984	114599992	117113672	71198528	91657576	73988680	93231392	61241048	82342240	163842784	104248008	101363136	126959048	122618216	113637208
O-Phosphocholine	Lipids	1023730176	951611968	1111789696	1017525632	1108304000	923459328	1301564288	1421922560	1510970752	1379352320	1322571392	1428020992	433616256	457788960	425428800	449140480	451338048	321423104
Adenine	Nucleotide and its derivatives	654910016	683247360	648665792	633726464	626104192	657941056	423905088	471336448	458211136	431500544	453198720	450083872	664321728	652056576	624588864	653843584	642212032	636902016
Adenosine	Nucleotide and its derivatives	70652640	74478800	69840752	67622344	66074372	65637704	41684524	49234184	44892572	40520116	45029304	44244264	75654936	70403400	69841352	74680136	72491960	68986832
Cytidine	Nucleotide and its derivatives	18291084	20383948	20461818	20073512	18549570	20084558	17438510	17346172	16667276	17777332	18577088	17244968	32433624	34359768	33703852	33226860	32801184	33953320
Cytosine	Nucleotide and its derivatives	1162270208	1179693824	1184096640	1192229248	1213421952	1197796352	1206216064	1158487168	1187513984	1256206592	1285699968	1229594112	1568789248	1674399488	1541557504	1558288896	1518565248	1601548928
Guanosine	Nucleotide and its derivatives	365388800	400640224	376881088	372227840	347415584	367359744	357758272	392756352	374579872	407091680	374004768	405863136	534850048	542578880	518827072	529431168	519725216	519007904
Piperidine	Nucleotide and its derivatives	793929728	871311616	824671296	826191680	803789632	887301376	938547008	934025216	868419008	1005581504	1032967360	898489280	2163408896	2149317888	2151195648	2121471616	2093896576	1990590464
UDP-xylose	Nucleotide and its derivatives	78584608	97173008	92996472	106390536	96699784	89699160	170006304	171197696	166960256	176219664	160434800	183549488	84860728	94636040	93269144	80064504	77757912	69603344
Uracil	Nucleotide and its derivatives	738524032	829741952	845343232	803122752	767508352	790354240	775671232	872846784	816715712	828351808	823029760	827224640	947293696	1000710656	921119232	947148032	986193728	868077952
Uric acid	Nucleotide and its derivatives	3985504	2949362	4401566	4979626	3236953	9421935	8017119	6597327	4128729	6557504	6389451	5629746	32887546	34467548	32199804	33343148	35027728	33059376
Uridine	Nucleotide and its derivatives	667565824	751336768	657989696	659765440	645580800	666972864	579012352	674363008	590130560	633532032	604760576	606756416	959565696	948373632	953542976	959051328	943609600	931834432
Uridine 5'-monophosphate	Nucleotide and its derivatives	305649376	313125984	285232000	287187424	336144576	265506928	297651456	270352960	266803456	244500704	292130944	270869888	219304832	206851664	204133824	236489120	227120928	207111200
Uridine monophosphate	Nucleotide and its derivatives	33371796	33591084	29294414	32622082	34935180	32779000	35303244	29467552	27085616	30412954	32553052	30522026	21987696	21766202	20467798	25936000	22865240	18611002
(S)-Lactate	Organic acids	325879424	623269184	906421120	280396896	780292224	390540832	216623936	548206400	157949344	388736128	595855872	380521760	1061970496	844988736	833752448	712416832	1021632576	551282048
Acetyl tributyl citrate	Organic acids	68068776	59204492	59608536	61355016	61418604	57182124	62438136	51407376	59529360	55017032	52343892	53272300	83969328	66101768	70206072	73600752	68188056	70057672
Aconitic acid	Organic acids	729724352	691976896	677744000	620922112	738603968	558468800	1064574656	1410609152	1637791104	1628789248	1516382080	1528902656	149816128	158389360	68656048	65383888	148298128	125966224
cis-Aconitic acid	Organic acids	1176482048	1147182848	1506401152	1116068608	1158436992	1208993280	1216113536	1814863488	1840562432	1904808192	1208354944	1552484736	962433216	1106909440	1426766464	1192837504	1043555328	636633792
Citraconic acid	Organic acids	356137952	392515392	423087296	388846592	367508256	364782592	495320864	525972448	593458944	606543040	556752960	574370752	165150928	164968240	170154416	162119936	164388480	147082032
Citric acid	Organic acids	18913357824	20999219200	20900655104	19920939008	18837377024	18372820992	26247864320	26253486080	31666245632	29797779456	26075523072	30256816128	4527141376	4247555072	4345762816	4154606592	4453335040	3726272000
D-(+)-Malic acid	Organic acids	9494693888	10018947072	10882288640	10570986496	9753558016	9405044736	7529778176	8249396736	10518975488	10182903808	9416064000	9086311424	3108632064	3614885888	3161326592	3069403904	3497427968	3000659200
Glycolic acid	Organic acids	817617280	788057344	796413760	775265344	774842688	810603456	1018875968	946774720	1096856960	1066048704	1193050112	1150167424	801494848	876758400	849869248	782556352	825011776	791124608
Maleic acid	Organic acids	1373202176	1345686144	1454392320	1295328640	1350224384	1298606592	1259261824	1169410816	1167601664	1243719552	1236812544	1217632896	1695953664	1670460160	1622356352	1650969600	1609893376	1636871040
Methylmalonic acid; LC-tDDA; CE10	Organic acids	136257040	150934528	119799032	121682048	165085872	143654256	191754832	160738480	130681984	208930288	207181888	169828480	108886704	107773344	97434160	120460216	107729472	98757928
Ortophosphate	Organic acids	1867017344	1916817792	1798759296	2012710912	2056718080	1762002688	3090655744	3652558080	3692746752	3224469504	2766499328	3331426048	1801730560	1891999616	1910125184	1885876096	1797645824	1555353088
Phenylpyruvic acid	Organic acids	72029552	74326184	75652368	73267784	71794744	74824384	96903296	87512256	92604552	106134584	102214888	94520920	48099000	49751440	42354024	43852488	44902784	42863316
Pimelic acid	Organic acids	38978424	45174812	42267908	37230288	33801636	43403268	35472632	30575532	30976964	28728746	28999660	31775472	63943348	58434500	60617736	62321720	57381544	58176716
Succinic acid	Organic acids	1333000704	1460239232	1372982656	1465580544	1257530368	1284235136	1243913088	1378134272	1470933632	1398087424	1191155840	1379875968	965566848	932623040	895218816	894975104	941047488	940676544
Clobazam	Other	44210924	49342112	46943816	56973072	45091316	40679836	37854772	52447504	40518940	47679780	39714336	40646872	55181292	73161080	59701004	51405212	48066420	54278200
Mucic acid	Other	2057978752	2280569856	2204029952	2110123904	2022311168	1778356352	2661952512	2480866048	3072960000	2889733888	2371305728	2942620672	1410852864	1437461376	1490922880	1347119744	1297048576	1126959232
Phenylacetaldehyde	Other	3743379968	3819539968	3927057664	3577502208	3617344000	3789419264	2824753920	3090748416	3207207936	3380857600	3150327808	3058457600	5435372032	6288250368	6358511616	5707436544	5655516160	5556625408
[6-[3,4-dihydroxy-2,5-bis(hydroxymethyl)oxolan-2-yl]oxy-3,4,5-trihydroxyoxan-2-yl]methyl (E)-3-(4-hydroxy-3-methoxyphenyl)prop-2-enoate	Phenolic acids	29444324	38456000	36913720	31089550	30442370	32000804	14384254	11210277	12495603	12339515	11012651	12749943	25067842	23489944	21734402	24284678	23963812	22690912
1-O-b-D-glucopyranosyl sinapate	Phenolic acids	9836031	9991163	11037070	10768645	10580745	8861440	11465284	14478172	17139928	15666263	14780711	15392823	7325754	8604750	9071505	7236020	7613839	7481176
Caffeic acid	Phenolic acids	417510432	460996608	497608192	414444480	416004192	427826592	290336224	306851520	354950784	378837312	360107040	356716192	456986272	513568480	499119360	448786336	458777824	441683808
Caffeic acid hexoside	Phenolic acids	3860626176	4384406016	4194785792	3664220416	3750212352	3866473216	2372933376	2306404352	2657019392	2587289600	2595538944	2655592448	5370041856	6299062272	5916038656	4837069824	4971813376	5046219264
Caffeoyl lysine	Phenolic acids	6191138	5879896	7224368	4840279	5873564	5851714	806828	728693	668151	868731	798799	784698	86800216	143774656	131773512	95445080	83710096	63454416
Coumarin + 1O + 1MeO, O-Hex-Hex	Phenolic acids	45651580	49883288	52442712	48650244	41277816	41071532	27193936	30863090	34877012	34377772	36399132	30968948	87000504	125337912	109052616	97390936	98903480	80990080
Coumaroyl Hexoside (isomer of 690, 691)	Phenolic acids	1568260608	1769151872	1776262784	1543130624	1548135680	1664118144	1210304384	1551530752	2044615040	1676833280	1748633984	1812075648	949555520	976512576	1003160960	896182016	885716608	790508800
NCGC00385695-01_C21H28O13_alpha-D-Glucopyranoside, beta-L-fructofuranosyl 6-O-[(2E)-3-(4-hydroxyphenyl)-1-oxo-2-propen-1-yl]-	Phenolic acids	345506528	340364416	371574816	307153792	304576128	296544672	269399520	237436208	255149216	259546080	263341872	239782928	362654784	339465312	301321728	336665536	352681440	320930624
Phenylacetic acid	Phenolic acids	932600576	1074832768	1024872448	950946368	924033856	923075264	583470080	589767936	687819328	673269248	659798208	679558400	1149543168	1314416512	1277619968	1137420800	1083931776	1050034752
Pyrogallol	Phenolic acids	6064262144	5949477888	5983149568	5873222656	6068106240	6191608320	5733070848	5759973376	6209467392	5857802752	6047114240	5877308928	5412052992	5238032896	5153414144	5251913728	5354371072	5115124736
Sinapoylmalate	Phenolic acids	22196344	22544554	22404276	23303498	19878964	23535564	13825970	13233472	15015581	14316644	15204504	14534155	26444278	30537786	28240902	27662036	28670980	26400868
Trans-caffeic acid	Phenolic acids	219199424	245856864	230148464	203992800	201430160	222562288	144295344	147064544	182406112	174684352	182545200	198714304	256997184	262577408	245622128	245739344	229341760	231305664
3-Phosphoglyceric acid	Saccharides and Alcohols	110193088	55798208	151711472	110430552	111073984	66507000	247601776	250902304	260916256	254986688	124272752	236437024	116397680	117017208	79627504	111210976	120041528	77138584
Allose	Saccharides and Alcohols	609583040	665450816	652742080	694879040	664157696	915851200	609498752	661289344	766949504	717518592	935044992	666277120	352302208	475362368	561297088	530324096	599209600	610919680
D(-)-Gulono-gamma-lactone	Saccharides and Alcohols	212023136	152880176	166862464	227408096	210969792	229786560	165729600	157583232	177729536	159458224	215913264	220860896	231251232	225668128	236405664	240159136	246394064	205589584
D-Galactose	Saccharides and Alcohols	528535328	302649984	205664192	321891200	499280000	280458784	411840992	320400544	594932608	642569024	381302208	835547200	125645824	128624248	131775088	132084168	130355432	254465936
maltotriose	Saccharides and Alcohols	155263152	143991280	133560312	128611112	132980248	142968528	124552480	141834144	144129360	133627048	122313568	148080320	119047832	107820040	105270064	109350368	110183528	95340088
Melezitose	Saccharides and Alcohols	208347328	188680720	189468496	185157712	198644240	191423040	169344640	167696224	192768544	175254480	173605440	176652688	158482736	145808992	134312752	144880560	135873648	132130240
Ribose	Saccharides and Alcohols	1459796736	1532649344	1574072576	1519490688	1463039104	1478043008	1678029056	1605829504	1651171072	1663128320	1665919744	1715070464	1007954816	1080098944	1081354240	1021070912	1010049408	976716416
Sucrose	Saccharides and Alcohols	39273123840	38896005120	39527526400	36300939264	38589665280	37349269504	31636623360	31635034112	31252527104	29402337280	31127597056	29653594112	42057940992	37803503616	38085713920	39733948416	38277455872	39388418048
Threonic acid	Saccharides and Alcohols	2059315328	2083010432	2119067776	1882414848	2010994944	1983908096	2473835008	4398257152	3459804160	4892221440	2580923904	3099290624	1496876288	1491710976	1458476160	1552894592	1390474240	1481111680
4-Pyridoxate	Vitamin	18520024	19647450	19722476	23169486	21000938	17106236	19254962	18277746	21218246	19531632	20844348	18600584	25768516	26330258	25226980	22889312	25452782	23114016
Dehydroascorbic acid	Vitamin	1730161024	1660967168	2196238848	1755770624	1855544192	1753677184	1850807808	2751962624	2678003200	2804402176	1795852160	2391618048	1130939776	1322790784	1495884032	1214206464	1256733440	887017856
D-Pantothenic acid	Vitamin	34507396	38111224	39577848	37442396	33986004	37082268	34427976	32851634	36681704	38315868	42711048	40487576	26335338	27422180	25570558	26901242	26611160	25288774
Niacinamide	Vitamin	257595792	255820464	267480528	326967264	268552832	251277024	558203072	404634336	514644928	299048000	306990688	321458880	206750352	248968464	261768544	223031520	373388416	269657152

## Sheet: S3
Class	Others	Vitamins	Alkaloids	Saccharides and Alcohols	Lipids	Nucleotide and its derivatives	Phenolic acids	Organic acids	Amino acids and derivatives
HaiDong_1	5997510790	2007665271	8305655447	44318648528	4217474487	5075398773	13936563319	38207998952	133064000000
HaiDong_2	5961315308	2333184735	8655059015	43045949140	4337957704	5023006857	13642093781	39878526738	135595000000
HaiDong_3	5646600968	2119113339	8287461525	43259510504	4523372275	5005157932	13512040809	36591177996	131985000000
WuWei_1	5574311586	2835210079	6557353485	38427941112	5326339861	4949611020	10820514220	45024598422	114817000000
WuWei_2	6319479072	3205922877	6220737837	38271014620	5149748525	4950180306	12078727544	52998805259	113138000000
WuWei_3	5801536508	2469281666	5824518395	37039351688	5350583943	5049423814	11914727350	48477549022	115684000000
JiuQuan_1	7350139506	1507652834	15420295340	43620757064	4302432515	7367640208	14732925437	15668193756	176378000000
JiuQuan_2	7507548500	1647739326	15481557424	42725077852	4511451631	7208710731	14050983108	15212990680	172856000000
JiuQuan_3	6869246998	1443631798	15926816204	42620933788	4362586250	7075777061	13388160582	14581107024	169882000000
